# Supplementary material
Source: publisher site journal article supplement (https://www.dovepress.com/article/297897)
Supplement: Supplementary file 1 [file get_supplementary_file.php]

Supplement 1.

Ethics Committees for each institution

University Hospital (C/O Instituto Clinica Chirugica II)

Comitato Etico dell'Universita "Sapienza"

Maria Amato, Irene Bottillo, Avia Carabelli, Lacopo Carbone, Francesco Cognetti, Enrico Cortesi, Anna Dalle Ore, Marzia Duse, Giovanni Fabbrini, Vittorio Fineschi, Paola Frati, Laura Gasbarrone, Giovanni Battista Grassi, Francesco Lombardo, Maria Teresa Lupo, Franco Mandelli, Pasquale Marini, Boza Mauro, Enrica Maria Proli, Marco Salvetti, Francesco Scacchi, Elisabetta Simongini, Lorenzo Sommella, Giovanni Spera, Luca Steardo, Agostino Tafuri, Ettore Tiberi, Annarita Vestri, Francesco Violi, Massimo Volpe, Maurizio Muscaritoli, Remigio Tecchia

Centre Hospitalier Emile Mayrisch

Comite National D’Ethique De Recherche

Georges Michel, Jean-Louis Robert, Marc Hastert, Dirk Droste, Joel Biwer, Robert Elter, Daniel Wagner, Jacques Kremer, Jean-Paul Harpes, Serge Schneider, Abdul-Aziz Makhlouf

Whipps Cross University Hospital, Torbay Hospital, & Royal Victoria Infirmary

Cambridgeshire 1 Research Ethics Committee

Daryl Rees, Carole Alderton, Chris Bennett, Simon Bond, Ruth Clapham, Ian Dumbelton, Catherine Hubbard, Frank Milligan, Helen Munday, Michael Simmonds, Angela Tasker, Melanie Whittick, Alison Wooster

Universitätsklinikum des Saarlandes

Ärztekammer des Saarlandes

Hermann Schieffer, Gerd Rettig-Stürmer, Uwe Feldmann, Veit Flockerzi, Ulrich Kiefaber, Egon Müller, Carola Peters, Karl-Heinz Altemeyer, Werner Schmidt, Walter Hoffmann, Jochen Wilske, Peter Schmidt, Manfred Birkenheier, Marc Freichel, Bernd Luxenburger, Hermann Wuttke, Renate Dessauer

Istituto Nazionale Tumori

Comitato Etico Indipendente

Paolo Casavola, Andrea Renda, Bruno Daniele, Luigi Palmieri, Francesco Roca, Giuseppe Cirino, Rosalba Rufano, Angelo Castaldo, Domenico de Simone, Ruggiero Nigro, Carmine Nappi, Antonio Febbraro, Salvatore Panico, Ciro Carbone, Marco Ivaldo, Giandomenico Lepore, Sergio Lodato, Gennaro Ciliberto, Piera Maiolino

Humanitas University and IRCCS Humanitas Research Hospital

Comitato Etico Indipendente, Instituto Clinico Humanitas – IRCCS

Giuseppe Torrani, Armando Santoro, Franco Pazzucconi, Norberto Silvestri, Sergio Pellegrino, Valter Torri, Giuliana Bossi Rocca, Mario Fazio, Barbra Miclini, Alberto Mantovani, Leandro Gennari, Giancarlo Rovati

Algemeen Ziekenhuis Sint LUCAS

Commissie medische ethiek

J. Botterman, C. Katleen, D. De Backer, D. De Brauwere, L. Deruyck, R. Hache, I. Martens, H. Martens, B. Noens, H. Vandekerchhove, J. Vanthienen, A.M. Van den Abeele, J.P. Can Durme, R. Verminck, H. Willekens

CHU Ambroise Pare

Comite D’Ethique

Vincent Richard, Michele Brasseur, Jean-Francois Simon, Xavier Malaviolle, Philippe Charle, Robert Leach, Barbara Plehiers, Philippe Delmontte, Marleen Degreef, Mireille Mousset, Maryline Ackx, Eric Pilote, Valerie Polart, Zecchia Bouri, Beatrice Compagnion
